# Supplementary material
Source: HighWire-hosted journal article supplement (https://bmjopen.bmj.com/content/13/6/e070246)
Supplement: inline-supplementary-material-1 [file inline-supplementary-material-1.pdf]

**Undernutrition Amongst Children Living in Refugee Camps: A Systematic Review of Prevalence**

**Supplementary Material**

Annabel Skinner <sup>1</sup>, Michelle Tester-Jones <sup>1</sup>, Daniele Carrieri <sup>1</sup>

<sup>1</sup> Faculty of Health and Life Sciences, University of Exeter, Exeter, UK.

Corresponding Author: Annabel Skinner

University of Exeter Medical School

St Luke's Campus

Heavitree Road, Exeter

EX1 2LU

annabelskinner98@gmail.com

## APPENDICES

## Appendix 1 – PRISMA checklist [1]

| Section and Topic             | Item # | Checklist item                                                                                                                                                                                                                                                                                       | Location where item is reported |
|-------------------------------|--------|------------------------------------------------------------------------------------------------------------------------------------------------------------------------------------------------------------------------------------------------------------------------------------------------------|---------------------------------|
| <b>TITLE</b>                  |        |                                                                                                                                                                                                                                                                                                      |                                 |
| Title                         | 1      | Identify the report as a systematic review.                                                                                                                                                                                                                                                          | P1                              |
| <b>ABSTRACT</b>               |        |                                                                                                                                                                                                                                                                                                      |                                 |
| Abstract                      | 2      | See the PRISMA 2020 for Abstracts checklist.                                                                                                                                                                                                                                                         | N/A                             |
| <b>INTRODUCTION</b>           |        |                                                                                                                                                                                                                                                                                                      |                                 |
| Rationale                     | 3      | Describe the rationale for the review in the context of existing knowledge.                                                                                                                                                                                                                          | P4/5                            |
| Objectives                    | 4      | Provide an explicit statement of the objective(s) or question(s) the review addresses.                                                                                                                                                                                                               | P5                              |
| <b>METHODS</b>                |        |                                                                                                                                                                                                                                                                                                      |                                 |
| Eligibility criteria          | 5      | Specify the inclusion and exclusion criteria for the review and how studies were grouped for the syntheses.                                                                                                                                                                                          | P5/6<br>Appendix 2              |
| Information sources           | 6      | Specify all databases, registers, websites, organisations, reference lists and other sources searched or consulted to identify studies. Specify the date when each source was last searched or consulted.                                                                                            | P6                              |
| Search strategy               | 7      | Present the full search strategies for all databases, registers and websites, including any filters and limits used.                                                                                                                                                                                 | Appendix 3/4                    |
| Selection process             | 8      | Specify the methods used to decide whether a study met the inclusion criteria of the review, including how many reviewers screened each record and each report retrieved, whether they worked independently, and if applicable, details of automation tools used in the process.                     | P6                              |
| Data collection process       | 9      | Specify the methods used to collect data from reports, including how many reviewers collected data from each report, whether they worked independently, any processes for obtaining or confirming data from study investigators, and if applicable, details of automation tools used in the process. | P7                              |
| Data items                    | 10a    | List and define all outcomes for which data were sought. Specify whether all results that were compatible with each outcome domain in each study were sought (e.g. for all measures, time points, analyses), and if not, the methods used to decide which results to collect.                        | P7                              |
|                               | 10b    | List and define all other variables for which data were sought (e.g. participant and intervention characteristics, funding sources). Describe any assumptions made about any missing or unclear information.                                                                                         | P7/Appendix 5                   |
| Study risk of bias assessment | 11     | Specify the methods used to assess risk of bias in the included studies, including details of the tool(s) used, how many reviewers assessed each study and whether they worked independently, and if applicable, details of automation tools used in the process.                                    | P7                              |
| Effect measures               | 12     | Specify for each outcome the effect measure(s) (e.g. risk ratio, mean difference) used in the synthesis or presentation of results.                                                                                                                                                                  | P7                              |
| Synthesis methods             | 13a    | Describe the processes used to decide which studies were eligible for each synthesis (e.g. tabulating the study intervention characteristics and comparing against the planned groups for each synthesis (item #5)).                                                                                 | P7                              |

| Section and Topic             | Item # | Checklist item                                                                                                                                                                                                                                                                       | Location where item is reported |
|-------------------------------|--------|--------------------------------------------------------------------------------------------------------------------------------------------------------------------------------------------------------------------------------------------------------------------------------------|---------------------------------|
|                               | 13b    | Describe any methods required to prepare the data for presentation or synthesis, such as handling of missing summary statistics, or data conversions.                                                                                                                                | N/A                             |
|                               | 13c    | Describe any methods used to tabulate or visually display results of individual studies and syntheses.                                                                                                                                                                               | P7                              |
|                               | 13d    | Describe any methods used to synthesize results and provide a rationale for the choice(s). If meta-analysis was performed, describe the model(s), method(s) to identify the presence and extent of statistical heterogeneity, and software package(s) used.                          | P7                              |
|                               | 13e    | Describe any methods used to explore possible causes of heterogeneity among study results (e.g. subgroup analysis, meta-regression).                                                                                                                                                 | N/A                             |
|                               | 13f    | Describe any sensitivity analyses conducted to assess robustness of the synthesized results.                                                                                                                                                                                         | N/A                             |
| Reporting bias assessment     | 14     | Describe any methods used to assess risk of bias due to missing results in a synthesis (arising from reporting biases).                                                                                                                                                              | N/A                             |
| Certainty assessment          | 15     | Describe any methods used to assess certainty (or confidence) in the body of evidence for an outcome.                                                                                                                                                                                | N/A                             |
| <b>RESULTS</b>                |        |                                                                                                                                                                                                                                                                                      |                                 |
| Study selection               | 16a    | Describe the results of the search and selection process, from the number of records identified in the search to the number of studies included in the review, ideally using a flow diagram.                                                                                         | P9 / Figure 1                   |
|                               | 16b    | Cite studies that might appear to meet the inclusion criteria, but which were excluded, and explain why they were excluded.                                                                                                                                                          | N/A                             |
| Study characteristics         | 17     | Cite each included study and present its characteristics.                                                                                                                                                                                                                            | P8 / Appendix 6                 |
| Risk of bias in studies       | 18     | Present assessments of risk of bias for each included study.                                                                                                                                                                                                                         | Appendix 6                      |
| Results of individual studies | 19     | For all outcomes, present, for each study: (a) summary statistics for each group (where appropriate) and (b) an effect estimate and its precision (e.g. confidence/credible interval), ideally using structured tables or plots.                                                     | Table 3 and Figures 2-10        |
| Results of syntheses          | 20a    | For each synthesis, briefly summarise the characteristics and risk of bias among contributing studies.                                                                                                                                                                               | P8/9                            |
|                               | 20b    | Present results of all statistical syntheses conducted. If meta-analysis was done, present for each the summary estimate and its precision (e.g. confidence/credible interval) and measures of statistical heterogeneity. If comparing groups, describe the direction of the effect. | Figures 2-10                    |
|                               | 20c    | Present results of all investigations of possible causes of heterogeneity among study results.                                                                                                                                                                                       | N/A                             |
|                               | 20d    | Present results of all sensitivity analyses conducted to assess the robustness of the synthesized results.                                                                                                                                                                           | N/A                             |
| Reporting biases              | 21     | Present assessments of risk of bias due to missing results (arising from reporting biases) for each synthesis assessed.                                                                                                                                                              | N/A                             |
| Certainty of evidence         | 22     | Present assessments of certainty (or confidence) in the body of evidence for each outcome assessed.                                                                                                                                                                                  | N/A                             |
| <b>DISCUSSION</b>             |        |                                                                                                                                                                                                                                                                                      |                                 |
| Discussion                    | 23a    | Provide a general interpretation of the results in the context of other evidence.                                                                                                                                                                                                    | P10-11                          |

| Section and Topic                              | Item # | Checklist item                                                                                                                                                                                                                             | Location where item is reported |
|------------------------------------------------|--------|--------------------------------------------------------------------------------------------------------------------------------------------------------------------------------------------------------------------------------------------|---------------------------------|
|                                                | 23b    | Discuss any limitations of the evidence included in the review.                                                                                                                                                                            | P12                             |
|                                                | 23c    | Discuss any limitations of the review processes used.                                                                                                                                                                                      | P12                             |
|                                                | 23d    | Discuss implications of the results for practice, policy, and future research.                                                                                                                                                             | P12-13                          |
| <b>OTHER INFORMATION</b>                       |        |                                                                                                                                                                                                                                            |                                 |
| Registration and protocol                      | 24a    | Provide registration information for the review, including register name and registration number, or state that the review was not registered.                                                                                             | N/A                             |
|                                                | 24b    | Indicate where the review protocol can be accessed, or state that a protocol was not prepared.                                                                                                                                             | N/A                             |
|                                                | 24c    | Describe and explain any amendments to information provided at registration or in the protocol.                                                                                                                                            | N/A                             |
| Support                                        | 25     | Describe sources of financial or non-financial support for the review, and the role of the funders or sponsors in the review.                                                                                                              | N/A                             |
| Competing interests                            | 26     | Declare any competing interests of review authors.                                                                                                                                                                                         | N/A                             |
| Availability of data, code and other materials | 27     | Report which of the following are publicly available and where they can be found: template data collection forms; data extracted from included studies; data used for all analyses; analytic code; any other materials used in the review. | N/A                             |

**Appendix 2: Inclusion and exclusion criteria**

| <b>Inclusion criteria</b>                                                                                      | <b>Exclusion criteria</b>                                                                                                       |
|----------------------------------------------------------------------------------------------------------------|---------------------------------------------------------------------------------------------------------------------------------|
| Includes data on the prevalence of undernutrition (i.e. stunting, wasting, underweight or acute malnutrition). | Data for children under 5 years cannot be separated from data for other age groups or from groups living outside refugee camps. |
| Some or all participants were living in a refugee camp.                                                        | Studies focussed micronutrient deficiencies or overweight and obesity only.                                                     |
| Some or all participants are children aged less than 5 years (60 months) old.                                  | Focussed solely on displaced people not living in camps outside their country of origin.                                        |
| Primary data from observational study or survey.                                                               | Review papers, meta-analyses, editorials, comments, case-reports.                                                               |
| Access to full text in English language in public domain or with institutional access.                         | Intervention studies.                                                                                                           |
| Published in 2015 or later.                                                                                    |                                                                                                                                 |

**Appendix 3 - Search Strategy**

| Database             | Search strategy         | Date                                                                                              | Papers retrieved |    |
|----------------------|-------------------------|---------------------------------------------------------------------------------------------------|------------------|----|
| OVID<br>Medline      | 1                       | refugee camp*.ti,ab.                                                                              | 12.05.22         | 23 |
|                      | 2                       | exp Refugee Camps/                                                                                |                  |    |
|                      | 3                       | 1 or 2                                                                                            |                  |    |
|                      | 4                       | child*.ti,ab.                                                                                     |                  |    |
|                      | 5                       | infan*.ti,ab.                                                                                     |                  |    |
|                      | 6                       | exp child/                                                                                        |                  |    |
|                      | 7                       | exp infant/                                                                                       |                  |    |
|                      | 8                       | 4 or 5 or 6                                                                                       |                  |    |
|                      | 9                       | malnutrition.ti,ab.                                                                               |                  |    |
|                      | 10                      | nutrition*.ti,ab.                                                                                 |                  |    |
|                      | 11                      | malnourish*.ti,ab.                                                                                |                  |    |
|                      | 12                      | underweight.ti,ab.                                                                                |                  |    |
|                      | 13                      | stunt*.ti,ab.                                                                                     |                  |    |
|                      | 14                      | wast*.ti,ab.                                                                                      |                  |    |
|                      | 15                      | undern*.ti,ab.                                                                                    |                  |    |
|                      | 16                      | anthropometr*.ti,ab.                                                                              |                  |    |
|                      | 17                      | exp child nutrition disorders/                                                                    |                  |    |
|                      | 18                      | exp malnutrition/                                                                                 |                  |    |
|                      | 19                      | exp infant nutrition disorders/                                                                   |                  |    |
|                      | 20                      | wasting syndrome/                                                                                 |                  |    |
|                      | 21                      | exp growth disorders/                                                                             |                  |    |
|                      | 22                      | exp anthropometry/                                                                                |                  |    |
|                      | 23                      | exp body size/                                                                                    |                  |    |
|                      | 24                      | exp nutritional status/                                                                           |                  |    |
|                      | 25                      | exp body mass index/                                                                              |                  |    |
|                      | 26                      | 9 or 10 or 11 or 12 or 13 or 14 or 15 or 16 or 17 or 18 or 19 or 20 or 21 or 22 or 23 or 24 or 25 |                  |    |
|                      | 27                      | prevalen*.ti,ab.                                                                                  |                  |    |
|                      | 28                      | epidemiolog*.ti,ab.                                                                               |                  |    |
|                      | 29                      | proportion.ti,ab.                                                                                 |                  |    |
|                      | 30                      | frequen*.ti,ab.                                                                                   |                  |    |
|                      | 31                      | exp Prevalence/                                                                                   |                  |    |
|                      | 32                      | 27 or 28 or 29 or 30 or 31                                                                        |                  |    |
|                      | 33                      | 1 and 8 and 26 and 32                                                                             |                  |    |
|                      | Published 2015 or later |                                                                                                   |                  |    |
| CAB Global<br>Health | 1                       | refugee camp*.ti,ab.                                                                              | 12.05.22         | 24 |
|                      | 2                       | child*.ti,ab.                                                                                     |                  |    |
|                      | 3                       | infan*.ti,ab.                                                                                     |                  |    |
|                      | 4                       | malnutrition.ti,ab.                                                                               |                  |    |
|                      | 5                       | nutrition*.ti,ab.                                                                                 |                  |    |
|                      | 6                       | malnourish*.ti,ab.                                                                                |                  |    |
|                      | 7                       | underweight.ti,ab.                                                                                |                  |    |
|                      | 8                       | stunt*.ti,ab.                                                                                     |                  |    |
|                      | 9                       | wast*.ti,ab.                                                                                      |                  |    |
|                      | 10                      | undern*.ti,ab.                                                                                    |                  |    |

|        |    |                                                                                                                                                                                                                                                                                                                                                                                                                                                                                                                                                                                                                      |          |    |
|--------|----|----------------------------------------------------------------------------------------------------------------------------------------------------------------------------------------------------------------------------------------------------------------------------------------------------------------------------------------------------------------------------------------------------------------------------------------------------------------------------------------------------------------------------------------------------------------------------------------------------------------------|----------|----|
|        | 11 | anthropometr*.ti,ab.                                                                                                                                                                                                                                                                                                                                                                                                                                                                                                                                                                                                 |          |    |
|        | 12 | nutrition disorder*.ti,ab.                                                                                                                                                                                                                                                                                                                                                                                                                                                                                                                                                                                           |          |    |
|        | 13 | growth disorder*.ti,ab.                                                                                                                                                                                                                                                                                                                                                                                                                                                                                                                                                                                              |          |    |
|        | 14 | body mass index.ti,ab.                                                                                                                                                                                                                                                                                                                                                                                                                                                                                                                                                                                               |          |    |
|        | 15 | prevalen*.ti,ab.                                                                                                                                                                                                                                                                                                                                                                                                                                                                                                                                                                                                     |          |    |
|        | 16 | epidemiolog*.ti,ab.                                                                                                                                                                                                                                                                                                                                                                                                                                                                                                                                                                                                  |          |    |
|        | 17 | proportion.ti,ab.                                                                                                                                                                                                                                                                                                                                                                                                                                                                                                                                                                                                    |          |    |
|        | 18 | frequen*.ti,ab.                                                                                                                                                                                                                                                                                                                                                                                                                                                                                                                                                                                                      |          |    |
|        | 19 | 2 or 3                                                                                                                                                                                                                                                                                                                                                                                                                                                                                                                                                                                                               |          |    |
|        | 20 | 4 or 5 or 6 or 7 or 8 or 9 or 10 or 11 or 12 or 13 or 14                                                                                                                                                                                                                                                                                                                                                                                                                                                                                                                                                             |          |    |
|        | 21 | 15 or 16 or 17 or 18                                                                                                                                                                                                                                                                                                                                                                                                                                                                                                                                                                                                 |          |    |
|        | 22 | 1 and 19 and 20 and 21                                                                                                                                                                                                                                                                                                                                                                                                                                                                                                                                                                                               |          |    |
|        |    | Published 2015 or later                                                                                                                                                                                                                                                                                                                                                                                                                                                                                                                                                                                              |          |    |
| PubMed |    | ("refugee camp"[Title/Abstract]) AND ((child*[Title/Abstract]) OR (infan*[Title/Abstract])) AND ((malnutrition[Title/Abstract]) OR (nutrition*[Title/Abstract]) OR (malnourish*[Title/Abstract]) OR (underweight[Title/Abstract]) OR (stunt*[Title/Abstract]) OR (wast*[Title/Abstract]) OR (undern*[Title/Abstract]) OR (anthropometr*[Title/Abstract]) OR ("nutrition* disorder*" [Title/Abstract]) OR (growth disorder*[Title/Abstract]) OR (body mass index*[Title/Abstract])) AND ((prevalen*[Title/Abstract]) OR (epidemiolog*[Title/Abstract]) OR (proportion[Title/Abstract]) OR (frequen*[Title/Abstract])) | 12.05.22 | 11 |
| Scopus |    | TITLE-ABS-KEY("refugee camp") AND TITLE-ABS-KEY(child* OR infan*) AND TITLE-ABS-KEY(malnutrition OR nutrition* OR malnourish* OR underweight OR stunt* OR wast* OR undern* OR anthropometr* OR "nutrition* disorder*" OR "nutrition* status" OR "growth disorder" OR "body mass index" OR BMI) AND TITLE-ABS-KEY(prevalen* OR epidemiolog* OR proportion OR frequen*) AND PUBYEAR AFT 2014                                                                                                                                                                                                                           | 12.05.22 | 40 |

**Appendix 4 – Supplementary search activities**

| <b>Source searched</b>                                                      | <b>Terms or strategy used</b>                                                                                                                                                                                                                                                                                                                                                                                                                                                                                                                                                                                                                                                                                                                      | <b>Date</b>          | <b>Reports retrieved</b> |
|-----------------------------------------------------------------------------|----------------------------------------------------------------------------------------------------------------------------------------------------------------------------------------------------------------------------------------------------------------------------------------------------------------------------------------------------------------------------------------------------------------------------------------------------------------------------------------------------------------------------------------------------------------------------------------------------------------------------------------------------------------------------------------------------------------------------------------------------|----------------------|--------------------------|
| Citation chasing                                                            | Manual searching of reference lists<br>Forward citation chasing using SCOPUS citation index or Web of Science where not available on SCOPUS                                                                                                                                                                                                                                                                                                                                                                                                                                                                                                                                                                                                        | 11/07/22             | 2                        |
| Google search                                                               | Terms used: 'child malnutrition survey refugee camps'                                                                                                                                                                                                                                                                                                                                                                                                                                                                                                                                                                                                                                                                                              | 11/07/22             | 11                       |
| Searching organisation websites                                             | UNHCR microdata library: <a href="https://microdata.unhcr.org">https://microdata.unhcr.org</a><br>Searched: 'nutrition' with date restriction 2015-2022<br>Reliefweb: <a href="https://reliefweb.int/">https://reliefweb.int/</a><br>Searched 'nutrition survey refugee' - restricted to theme "food and nutrition" and published after 31/12/2014                                                                                                                                                                                                                                                                                                                                                                                                 | 11/07/22<br>12/07/22 | 13<br>6                  |
| Other organisations' websites searched which returned no additional results | UNICEF ( <a href="https://www.unicef.org/">https://www.unicef.org/</a> )<br>WFP ( <a href="https://www.wfp.org/">https://www.wfp.org/</a> ),<br>Action Against Hunger ( <a href="https://www.actionagainsthunger.org.uk/">https://www.actionagainsthunger.org.uk/</a> ), ACAPS ( <a href="https://www.acaps.org/what-we-do/reports">https://www.acaps.org/what-we-do/reports</a> )<br>The Border Consortium ( <a href="https://www.theborderconsortium.org/category/reports-survey/">https://www.theborderconsortium.org/category/reports-survey/</a> )<br>Global Nutrition Cluster ( <a href="https://www.nutritioncluster.net/">https://www.nutritioncluster.net/</a> )<br>UNWRA ( <a href="https://www.unrwa.org/">https://www.unrwa.org/</a> ) | 12/07/22             | 0                        |



## Appendix 5 - Data extraction sheet

| <b>1. General information</b>                                     |                      |                         |
|-------------------------------------------------------------------|----------------------|-------------------------|
| <b>Report title</b>                                               |                      |                         |
| <b>Date form completed</b>                                        |                      |                         |
| <b>Publication type</b>                                           |                      |                         |
| <b>URL</b>                                                        |                      |                         |
| <b>Publication date</b>                                           |                      |                         |
| <b>Authors</b>                                                    |                      |                         |
| <b>Funding source</b>                                             |                      |                         |
| <b>Possible conflicts of interest</b>                             |                      |                         |
| <b>Notes</b>                                                      |                      |                         |
| <b>2. Study characteristics</b>                                   |                      |                         |
| <b>Characteristics</b>                                            | <b>Study details</b> | <b>Location in text</b> |
| <b>Type of study</b>                                              |                      |                         |
| <b>Condition / disease focus</b><br>(e.g. stunting, wasting, GAM) |                      |                         |
| <b>Notes</b>                                                      |                      |                         |
| <b>3. Population and setting</b>                                  |                      |                         |
| <b>Characteristics</b>                                            | <b>Study details</b> | <b>Location in text</b> |
| <b>Population description</b><br>(study population)               |                      |                         |
| <b>Source/setting of population</b>                               |                      |                         |
| <b>Notes</b>                                                      |                      |                         |
| <b>4. Methods</b>                                                 |                      |                         |
| <b>Characteristics</b>                                            | <b>Study details</b> | <b>Location in text</b> |
| <b>Aim of study</b>                                               |                      |                         |
| <b>Design</b>                                                     |                      |                         |
| <b>Sampling methods</b>                                           |                      |                         |
| <b>Methods of recruitment</b>                                     |                      |                         |
| <b>Study start date</b>                                           |                      |                         |
| <b>Study end date / duration</b>                                  |                      |                         |
| <b>Notes</b>                                                      |                      |                         |
| <b>5. Participants</b>                                            |                      |                         |
| <b>Characteristics</b>                                            | <b>Study details</b> | <b>Location in text</b> |
| <b>Total number of participants</b>                               |                      |                         |
| <b>Age groups</b>                                                 |                      |                         |
| <b>Age distribution</b>                                           |                      |                         |
| <b>Sex distribution</b>                                           |                      |                         |

|                                                                                  |                                           |                         |
|----------------------------------------------------------------------------------|-------------------------------------------|-------------------------|
| <b>Exclusion criteria</b>                                                        |                                           |                         |
| <b>Notes</b>                                                                     |                                           |                         |
| <b>6. Outcomes</b>                                                               |                                           |                         |
| <b>Characteristics</b>                                                           | <b>Study details</b>                      | <b>Location in text</b> |
| <b>Outcomes of interest to review</b>                                            |                                           |                         |
| <b>Outcome definition</b>                                                        |                                           |                         |
| <b>Measures, tools or scales used</b>                                            |                                           |                         |
| <b>Are measures/tools validated?</b><br>(Yes/No/Unclear/Not mentioned)           |                                           |                         |
| <b>Statistical measures used</b>                                                 |                                           |                         |
| <b>Method of outcome data collection</b>                                         |                                           |                         |
| <b>Other outcomes/variables reported and definitions, measures or tools used</b> |                                           |                         |
| <b>Notes</b>                                                                     |                                           |                         |
| <b>7. Results and findings</b>                                                   |                                           |                         |
| <b>Characteristics</b>                                                           | <b>Study details</b>                      | <b>Location in text</b> |
| <b>Results by subgroup</b><br>(confidence intervals?)                            |                                           |                         |
| <b>Response rate</b>                                                             |                                           |                         |
| <b>Any other results reported</b>                                                |                                           |                         |
| <b>Notes</b>                                                                     |                                           |                         |
| <b>8. Limitations</b>                                                            |                                           |                         |
| <b>Characteristics</b>                                                           | <b>Description stated in report/paper</b> | <b>Location in text</b> |
| <b>Strengths</b>                                                                 |                                           |                         |
| <b>Limitations</b>                                                               |                                           |                         |
| <b>Strategies to overcome limitations</b>                                        |                                           |                         |
| <b>Notes</b>                                                                     |                                           |                         |
| <b>9. Conclusions</b>                                                            |                                           |                         |
| <b>Characteristics</b>                                                           | <b>Study details</b>                      | <b>Location in text</b> |
| <b>Key conclusions of study authors</b>                                          |                                           |                         |
| <b>Notes</b>                                                                     |                                           |                         |

| <b>10. Joanna Briggs Institute critical appraisal checklist for studies reporting prevalence data</b>                                                                                                                                                           |                |               |                    |                           |
|-----------------------------------------------------------------------------------------------------------------------------------------------------------------------------------------------------------------------------------------------------------------|----------------|---------------|--------------------|---------------------------|
| (Guidance at: <a href="https://jbi.global/sites/default/files/2019-05/JBI_Critical_Appraisal-Checklist_for_Prevalence_Studies2017_0.pdf">https://jbi.global/sites/default/files/2019-05/JBI_Critical_Appraisal-Checklist_for_Prevalence_Studies2017_0.pdf</a> ) |                |               |                    |                           |
| <b>Question</b>                                                                                                                                                                                                                                                 | <b>Yes (1)</b> | <b>No (0)</b> | <b>Unclear (0)</b> | <b>Not applicable (0)</b> |
| 1. Was the sample frame appropriate to address the target population?                                                                                                                                                                                           |                |               |                    |                           |
| 2. Were study participants sampled in an appropriate way?                                                                                                                                                                                                       |                |               |                    |                           |
| 3. Was the sample size adequate?                                                                                                                                                                                                                                |                |               |                    |                           |
| 4. Were the study subjects and the setting described in detail?                                                                                                                                                                                                 |                |               |                    |                           |
| 5. Was the data analysis conducted with sufficient coverage of the identified sample?                                                                                                                                                                           |                |               |                    |                           |
| 6. Were valid methods used for the identification of the condition?                                                                                                                                                                                             |                |               |                    |                           |
| 7. Was the condition measured in a standard, reliable way for all participants?                                                                                                                                                                                 |                |               |                    |                           |
| 8. Was there appropriate statistical analysis?                                                                                                                                                                                                                  |                |               |                    |                           |
| 9. Was the response rate adequate, and if not, was the low response rate managed appropriately?                                                                                                                                                                 |                |               |                    |                           |
| <b>Score /9</b>                                                                                                                                                                                                                                                 |                |               |                    |                           |

## Appendix 6 - Summary of study characteristics

| First author, year [reference]   | Country                 | Context                                                                                                                                                 | Sample size (included in review) | Age range (months) | Type of study                                   | Outcome measures relevant to review (prevalence of) | JBI critical appraisal score (/9) |
|----------------------------------|-------------------------|---------------------------------------------------------------------------------------------------------------------------------------------------------|----------------------------------|--------------------|-------------------------------------------------|-----------------------------------------------------|-----------------------------------|
| AbuKishk N, 2021 [2]             | Jordan                  | Jerash and Souf refugee camps                                                                                                                           | 367                              | 6 to 59            | Mixed methods (cross-sectional and qualitative) | Stunting                                            | 7                                 |
| Ejigu B, 2017 [3]                | Ethiopia                | Addi Harush refugee camp                                                                                                                                | 367                              | 6 to 59            | Cross-sectional                                 | Stunting, wasting                                   | 6                                 |
| El Kishawi R, 2017 [4]           | Palestine               | Jablia refugee camp, El Remal urban area, Al Qarara rural area                                                                                          | 357 (217)                        | 24 to 59           | Cross-sectional                                 | Stunting                                            | 9                                 |
| Hossain S, 2016 [5]              | Lebanon, Jordan, Iraq   | Lebanon - refugees living in host communities in four areas; Jordan - Za'atri refugee camp and refugees living outside camps; Iraq - Domiz refugee camp | 3375 (1299)                      | 6 to 59            | Cross-sectional                                 | Acute malnutrition (by WHZ), stunting, underweight  | 9                                 |
| Leidman E, 2018 [6]              | Bangladesh              | Kutupalong refugee camp                                                                                                                                 | 268                              | 6 to 59            | Cross-sectional                                 | Acute malnutrition (by WHZ and MUAC), stunting      | 8                                 |
| Praditsorn P, 2019 [7]           | Thailand-Myanmar border | Ban Mai Nai Soi, Ban Mae Surin, Mae Ra Ma Laung, Mae La Oon, Mae La, Umpiem Mai, Nu Po, Ban Don Yang, and Tham Hin refugee camps                        | 2702                             | 6 to 59            | Cross-sectional                                 | Stunting, wasting (by WHZ)                          | 7                                 |
| Tepa A, 2020 [8]                 | Cameroon                | Gado-Badzere refugee camp                                                                                                                               | 83                               | 6 to 59            | Cross-sectional                                 | Stunting, wasting (by WHZ), underweight             | 5                                 |
| Walpole S, 2018 [9]              | Greece                  | Four refugee camps                                                                                                                                      | 177 (109)                        | 0 to 59            | Cross-sectional                                 | Stunting, wasting (by WHZ), underweight             | 5                                 |
| Mandre J, 2022 [10]              | Uganda                  | Bidi Bidi refugee camp and host population in Romogi/Kochi sub-counties                                                                                 | 340 (170)                        | 6 to 59            | Cross-sectional                                 | Stunting, wasting, underweight                      | 6                                 |
| Grammatikopoulou M, 2018 [11]    | Greece                  | Drama and Kaval refugee camps                                                                                                                           | 192 (65)                         | 12 to 59           | Cross-sectional                                 | Stunting, wasting (by WHZ), underweight             | 6                                 |
| The Border Consortium, 2020 [12] | Thailand-Myanmar border | Ban Mai Nai Soi, Ban Mae Surin, Mae Ra Ma Laung, Mae La Oon, Mae La, Umpiem Mai, Nu Po, Ban                                                             | 3780                             | 6 to 59            | Cross-sectional                                 | Acute malnutrition (by WHZ), stunting               | 6                                 |

|                                  |            |                                                                         |            |         |                 |                                                             |   |
|----------------------------------|------------|-------------------------------------------------------------------------|------------|---------|-----------------|-------------------------------------------------------------|---|
|                                  |            | Don Yang, and Tham Hin refugee camps                                    |            |         |                 |                                                             |   |
| UNHCR, 2016 [13]                 | Jordan     | Za'atri and Azraq refugee camps and refugees living in host communities | 1293 (800) | 6 to 59 | Cross-sectional | Acute malnutrition (by WHZ and MUAC), stunting, underweight | 9 |
| Hasib M, 2020 [14]               | Bangladesh | Kutupalong refugee camp and host population in Cox's Bazar and Dumki    | 300 (100)  | 0 to 59 | Cross-sectional | Stunting, wasting (by WHZ), underweight                     | 2 |
| Action Against Hunger, 2019 [15] | Bangladesh | Kutupalong and Nayapara refugee camps and refugees living outside camps | 1114 (646) | 6 to 59 | Cross-sectional | Acute malnutrition (by WHZ and MUAC), stunting, underweight | 9 |
| UNHCR, 2019 [16]                 | Algeria    | Laayoune, Awserd, Smara and Dakhla refugee camps                        | 1945       | 6 to 59 | Cross-sectional | Acute malnutrition (by WHZ and MUAC), stunting, underweight | 9 |
| Brhane H, 2019 [17]              | Ethiopia   | Adi-Harush and Hitsats refugee camps                                    | 471        | 6 to 59 | Cross-sectional | Stunting, wasting (by WHZ), underweight                     | 8 |
| UNHCR, 2018 [18]                 | Ethiopia   | Bokolmanyo, Buramino, Hiaweyn, Kobe and Melkadida refugee camps         | 1873       | 6 to 59 | Cross-sectional | Acute malnutrition (by WHZ and MUAC), stunting, underweight | 8 |
| UNHCR, 2017 [19]                 | Ethiopia   | Ayasita and Berhale refugee camps                                       | 1107       | 6 to 59 | Cross-sectional | Acute malnutrition (by WHZ and MUAC), stunting, underweight | 8 |
| UNHCR, 2019 [20]                 | Kenya      | Kakuma refugee camp and Kalobeyei refugee settlement                    | 1134 (466) | 6 to 59 | Cross-sectional | Acute malnutrition (by WHZ and MUAC), stunting              | 5 |
| UNHCR, 2018 [21]                 | Kenya      | Dagahaley, Ifo and Hagadera refugee camps                               | 1650       | 6 to 59 | Cross-sectional | Acute malnutrition (by WHZ and MUAC), stunting, underweight | 8 |
| UNHCR, 2015 [22]                 | Liberia    | Bahn, PTP and Little Wlebo refugee camps                                | 871        | 6 to 59 | Cross-sectional | Acute malnutrition (by WHZ and MUAC), stunting, underweight | 8 |
| UNHCR, 2017 [23]                 | Malawi     | Dzaleka and Luwani refugee camps and host population around camps       | 1466 (862) | 6 to 59 | Cross-sectional | Acute malnutrition (by WHZ and MUAC), stunting, underweight | 9 |
| UNHCR, 2019 [24]                 | Nepal      | Beldangi and Sanischare refugee camps                                   | 127        | 6 to 59 | Cross-sectional | Acute malnutrition (by WHZ and MUAC), stunting, underweight | 9 |

|                  |             |                                                                                                      |      |         |                 |                                                             |   |
|------------------|-------------|------------------------------------------------------------------------------------------------------|------|---------|-----------------|-------------------------------------------------------------|---|
| UNHCR, 2019 [25] | South Sudan | Gorom refugee camp                                                                                   | 251  | 6 to 59 | Cross-sectional | Acute malnutrition (by WHZ and MUAC), stunting, underweight | 8 |
| UNHCR, 2019 [26] | South Sudan | Pamir and Ajoung Thok refugee camps                                                                  | 548  | 6 to 59 | Cross-sectional | Acute malnutrition (by WHZ and MUAC), stunting, underweight | 8 |
| UNHCR, 2019 [27] | South Sudan | Doro, Yusuf Batil, Gendrassa and Kaya refugee camps                                                  | 2393 | 6 to 59 | Cross-sectional | Acute malnutrition (by WHZ and MUAC), stunting, underweight | 8 |
| UNHCR, 2020 [28] | Tanzania    | Nyarugasu Old, Nyarugasu New, Nduta and Mtendeli refugee camps                                       | 2469 | 6 to 59 | Cross-sectional | Acute malnutrition (by WHZ and MUAC), stunting, underweight | 9 |
| UNHCR, 2019 [29] | Rwanda      | Gihembe, Nyabiheke, Kiziba, Kigeme, Mugombwa and Mahama refugee camps                                | 1778 | 6 to 59 | Cross-sectional | Acute malnutrition (by WHZ and MUAC), stunting, underweight | 8 |
| UNHCR, 2018 [30] | Sudan       | Khor Alwaral, Um Sangour, Al Radis 1 & 2, El Kashafa, Jouri, and Alagaya & Dabat Bosin refugee camps | 2075 | 6 to 59 | Cross-sectional | Acute malnutrition (by WHZ and MUAC), stunting, underweight | 8 |
| UNHCR, 2017 [31] | Ethiopia    | Sherkole, Bambasi, Tongo, Tsore and Gure-Shembola refugee camps                                      | 1970 | 6 to 59 | Cross-sectional | Acute malnutrition (by WHZ and MUAC), stunting, underweight | 8 |
| UNHCR, 2017 [32] | Ethiopia    | Shimelba, Adi-Harush, Mai-Aini and Hitsats refugee camps                                             | 1148 | 6 to 59 | Cross-sectional | Acute malnutrition (by WHZ and MUAC), stunting, underweight | 8 |
| UNHCR, 2017 [33] | Ethiopia    | Pugnido I, Pugnido II, Kule, Tierkidi, Jewi, Nguennyiel and Okugo refugee camps                      | 2926 | 6 to 59 | Cross-sectional | Acute malnutrition (by WHZ and MUAC), stunting, underweight | 8 |
| UNHCR, 2018 [34] | Ethiopia    | Sheder, Awbarre and Kebribeyah refugee camps                                                         | 821  | 6 to 59 | Cross-sectional | Acute malnutrition (by WHZ and MUAC), stunting, underweight | 8 |

### References (for supplementary material)

- 1 Page MJ, McKenzie JE, Bossuyt PM, *et al.* The PRISMA 2020 statement: An updated guideline for reporting systematic reviews. *J Clin Epidemiol* 2021;**134**:178–89. doi:10.1016/J.JCLINEPI.2021.03.001/ATTACHMENT/8C73C195-8136-4850-A672-140561FA575F/MMC2.PDF
- 2 AbuKishk N, Gilbert H, Seita A, *et al.* Under-five malnutrition among Palestine refugee children living in camps in Jordan: a mixed-methods study. *BMJ Glob Health* 2021;**6**. doi:http://dx.doi.org/10.1136/bmjgh-2021-005577
- 3 Ejigu B, Legesse TG, Chercos DH. Prevalence and associated factors of malnutrition among children aged 6-59 months in Addi Harush Eritrean Refugees camp, Tigray region, North Ethiopia. *Journal of Pharmacy and Nutrition Sciences* 2017;**7**:164–71. <https://core.ac.uk/download/pdf/199938782.pdf> (accessed 23 May 2022).
- 4 el Kishawi RR, Soo KL, Abed YA, *et al.* Prevalence and associated factors influencing stunting in children aged 2-5 years in the Gaza Strip-Palestine: a cross-sectional study. *BMC Pediatr* 2017;**17**:210. doi:https://dx.doi.org/10.1186/s12887-017-0957-y
- 5 Hossain SMM, Leidman E, Kingori J, *et al.* Nutritional situation among Syrian refugees hosted in Iraq, Jordan, and Lebanon: cross sectional surveys. *Confl Health* 2016;**10**. <http://conflictandhealth.biomedcentral.com/articles/10.1186/s13031-016-0093-6>
- 6 Leidman E, Humphreys A, Cramer BG, *et al.* Acute malnutrition and anemia among rohingya children in Kutupalong Camp, Bangladesh. *JAMA - Journal of the American Medical Association* 2018;**319**:1505–6. doi:10.1001/jama.2018.2405
- 7 Praditsorn P, Churak P, Wimonpeerapattana W, *et al.* Prevalence of undernutrition and associated factors among children 6 to 59 months of age in refugee camps along Thailand-Myanmar border. *Southeast Asian Journal of Tropical Medicine and Public Health* 2019;**50**:372–82. <https://www.tm.mahidol.ac.th/seameo/2019-50-2/17-7770-14-372.pdf>
- 8 Tapa A, Abame I, Makamta V, *et al.* Nutritional status and humoral immune response to Plasmodium falciparum in children aged 6-59 months. *J Trop Med* 2020;**2020**. doi:http://dx.doi.org/10.1155/2020/1843780
- 9 Walpole SC, Abbara A, Gunst M, *et al.* Cross-sectional growth assessment of children in four refugee camps in Northern Greece. *Public Health* 2018;**162**:147–52. doi:http://dx.doi.org/10.1016/j.puhe.2018.05.004
- 10 Mandre J, Kaindi DWM, Kogi-Makau W. Nutrition Status of Refugee and Host-Country Children: Negotiating for Equal Distribution of Relief Food During Emergencies in Uganda. *J Immigr Minor Health* Published Online First: 28 March 2022. doi:10.1007/S10903-022-01354-4
- 11 Grammatikopoulou MG, Theodoridis X, Poulimeneas D, *et al.* Malnutrition surveillance among refugee children living in reception centres in Greece: a pilot study. *Int Health* 2019;**11**:30–5. doi:10.1093/INTHEALTH/IHY053
- 12 The Border Consortium. 2019 Nutrition Survey of Refugee Camps along the Thailand-Myanmar Border - Thailand | ReliefWeb. 2020.

- <https://reliefweb.int/report/thailand/2019-nutrition-survey-refugee-camps-along-thailand-myanmar-border> (accessed 11 Jul 2022).
- 13 UNHCR, UNICEF, WFP, *et al.* Interagency Nutrition Surveys amongst Syrian Refugees in Jordan. 2016. <https://data2.unhcr.org/en/documents/download/53758> (accessed 11 Jul 2022).
  - 14 Hasib M, Nazmul Hassan M, Hasan M, *et al.* Effect of nutritional status on Rohingya under-five children in Bangladesh. *International Journal of Public Health Science (IJPHS)* 2020;**9**:358–63. doi:10.11591/ijphs.v9i4.20546
  - 15 Action Against Hunger. Emergency Nutrition Assessment Final Report Nayapara & Kutupalong Registered Refugee Camps and Makeshift Settlements. 2019. [https://assessments.hpc.tools/attachments/fbd5827f-c0e0-4e80-b913-0840d4cdb568/ban\\_cxb\\_ena\\_r4\\_report\\_final.pdf](https://assessments.hpc.tools/attachments/fbd5827f-c0e0-4e80-b913-0840d4cdb568/ban_cxb_ena_r4_report_final.pdf) (accessed 11 Jul 2022).
  - 16 UNHCR, CISP, WFP. 2019 Nutrition Survey Sahrawi Refugee Camps, Tindouf, Algeria. 2019. [acaps.org/sites/acaps/files/key-documents/files/wfp\\_key\\_1.pdf](https://acaps.org/sites/acaps/files/key-documents/files/wfp_key_1.pdf) (accessed 11 Jul 2022).
  - 17 Brhane H, Mohammed B, Yeshita HY, *et al.* Prevalence and Associated Factors of Acute Malnutrition Among 6-59 Month Children in Adi-Harush and Hitsats Refugee Camps in Tigray Region Northern Ethiopia, 2017. *American Journal of Life Sciences* 2019;**6**:57–64. doi:10.11648/j.ajls.20180605.11
  - 18 UNHCR, WFP, ARRA, *et al.* Standardised Expanded Nutrition Survey (SENS) in Melkadida Refugee Camps Final Report. 2018. <https://microdata.unhcr.org/index.php/catalog/114/related-materials> (accessed 11 Jul 2022).
  - 19 UNHCR, WFP, ARRA, *et al.* Joint Standardized Expanded Nutrition Survey Final Report (Aysaita & Berhale) Refugee Camps, Afar Region, Ethiopia (September 2017). 2017. <https://microdata.unhcr.org/index.php/catalog/212/related-materials> (accessed 11 Jul 2022).
  - 20 UNHCR, WFP, AICHM, *et al.* Standardised Expanded Nutrition Surveys (SENS) Kakuma Refugee Camp and Kalobeyie Refugee Settlement. 2019. <https://microdata.unhcr.org/index.php/catalog/486/related-materials> (accessed 11 Jul 2022).
  - 21 UNHCR, IRC, Kenyan Red Cross, *et al.* Standardised Expanded Nutrition Survey (SENS) Dadaab Refugee Camps Final Report. 2018. <https://microdata.unhcr.org/index.php/catalog/583/related-materials> (accessed 11 Jul 2022).
  - 22 UNHCR, WFP, UNICEF, *et al.* Standardised Expanded Nutrition Survey (SENS) Report Bahn, PTP and Little Wlebo Refugee Camps. 2015. <https://microdata.unhcr.org/index.php/catalog/450/related-materials> (accessed 11 Jul 2022).
  - 23 UNHCR, WFP. Standardized Expanded Nutrition Survey (SENS) Dzaleka and Luwani Refugee Camps and the Host Communities, Dowa and Neno Districts, Malawi. 2017. <https://microdata.unhcr.org/index.php/catalog/660/related-materials> (accessed 11 Jul 2022).



- 24 UNHCR. UNHCR Nutrition survey Bhutanese Refugee Camps, Nepal. 2019. <https://microdata.unhcr.org/index.php/catalog/521/related-materials> (accessed 12 Jul 2022).
- 25 UNHCR, ACROSS, WFP, *et al.* Standardized Expanded Nutrition Survey (SENS) Final Report Gorom Refugee Camp. 2019. <https://microdata.unhcr.org/index.php/catalog/584/related-materials> (accessed 12 Jul 2022).
- 26 UNHCR, Samaritan's Purse, WFP, *et al.* Standardized Expanded Nutrition Survey (SENS) Final Report Pamir & Ajoung Thok refugee camps, Pariang County, South Sudan. 2019. <https://microdata.unhcr.org/index.php/catalog/590/related-materials> (accessed 12 Jul 2022).
- 27 UNHCR, International Medical Corps, WFP, *et al.* Standardized Expanded Nutrition Survey (SENS) Final Report Doro, Yusuf Batil, Gendrassa and Kaya refugee camps, Upper Nile State, Maban County, South Sudan. 2019. <https://microdata.unhcr.org/index.php/catalog/595/related-materials> (accessed 12 Jul 2022).
- 28 UNHCR. Standardized Expanded Nutrition Survey (SENS) in Kigoma Refugee Camps (Nyarugusu, Nduta and Mtendeli) Tanzania. 2020. <https://microdata.unhcr.org/index.php/catalog/235/related-materials> (accessed 12 Jul 2022).
- 29 UNHCR, WFP. Standardized Expanded Nutrition Survey (SENS) Final Report - Refugee camps in Rwanda. 2019. <https://reliefweb.int/report/rwanda/standardized-expanded-nutrition-survey-sens-final-report-refugee-camps-rwanda-august> (accessed 12 Jul 2022).
- 30 UNHCR, UNICEF, WFP, *et al.* Standardized Expanded Nutrition Survey (SENS) Final Report White Nile State South Sudanese Refugee Camps - Sudan. 2018. <https://reliefweb.int/report/sudan/standardized-expanded-nutrition-survey-sens-final-report-white-nile-state-south> (accessed 12 Jul 2022).
- 31 UNHCR, ARRA, WFP, *et al.* Joint Standardized Expanded Nutrition Survey (SENS) Final Report For Assosa (Sherkole, Bambasi, Tongo, Tsore And Gure Shembola) Refugee Camps Benishangul Gumuz Region – Ethiopia. 2017. <https://reliefweb.int/report/ethiopia/joint-standardized-expanded-nutrition-survey-final-report-assosa-sherkole-bambasi> (accessed 12 Jul 2022).
- 32 UNHCR, ARRA, WFP. Standardized Expanded Nutrition Survey (SENS) Final Report Ma-Aini, Adiharush, Shimelba and Hitsats Refugee Camps Tigray Region - Ethiopia. 2017. <https://reliefweb.int/report/ethiopia/standardized-expanded-nutrition-survey-sens-final-report-ma-aini-adiharush-shimelba> (accessed 12 Jul 2022).
- 33 UNHCR. Standardized Expanded Nutrition Survey (SENS) Final Report (Pugnido\_I, Pugnido\_II, Kule, Tierkidi, Jewi, Nguennyiel and Okugo) Refugee Camps Gambella Region - Ethiopia. 2017. <https://reliefweb.int/report/ethiopia/standardized-expanded-nutrition-survey-sens-final-report-pugnidoi-pugnidoii-kule> (accessed 12 Jul 2022).
- 34 UNHCR, Government of Ethiopia, WFP. Standardised Expanded Nutrition Survey (SENS) Awbarre, Kebribeyah and Sheder Refugee Camps in Jijiga, Ethiopia Somali Region. 2018. <https://reliefweb.int/report/ethiopia/standardised-expanded-nutrition-survey-sens-awbarre-kebribeyah-and-sheder-refugee> (accessed 12 Jul 2022).
